# Supplementary material
Source: Springer Nature journal article supplement (https://www.springermedizin.de/resource/supplementary/13017_2010_173_MOESM2_ESM.pdf/9635626)

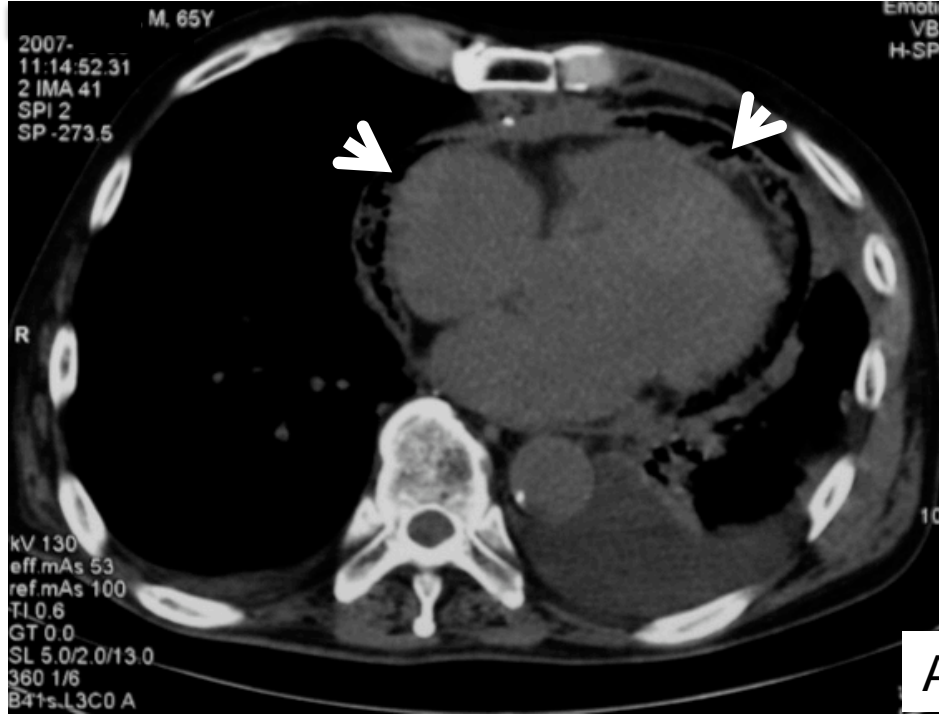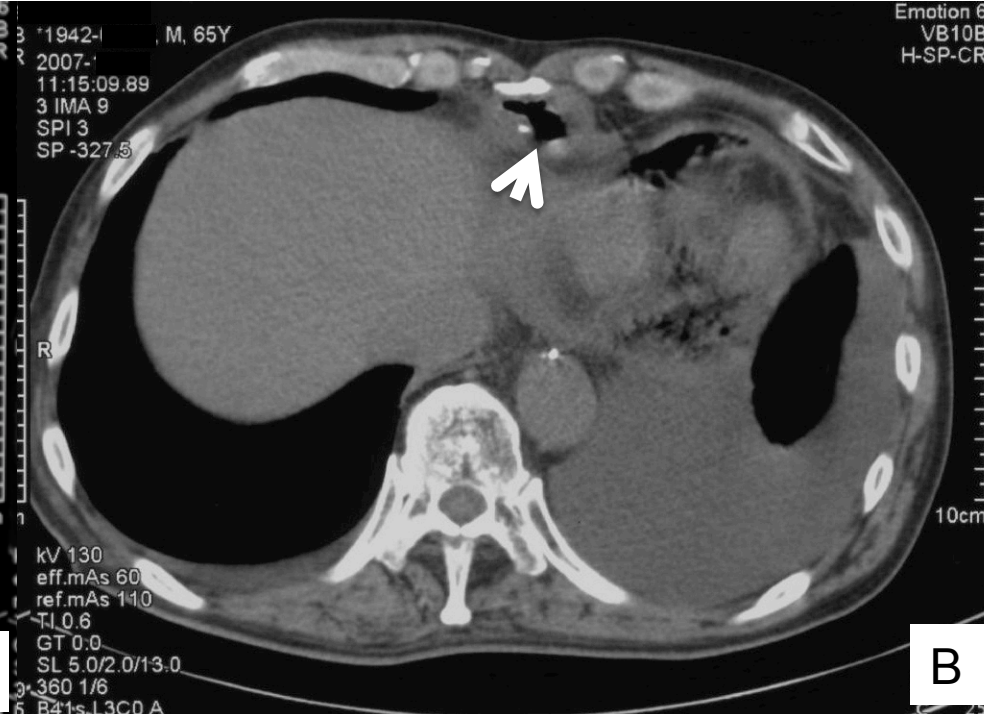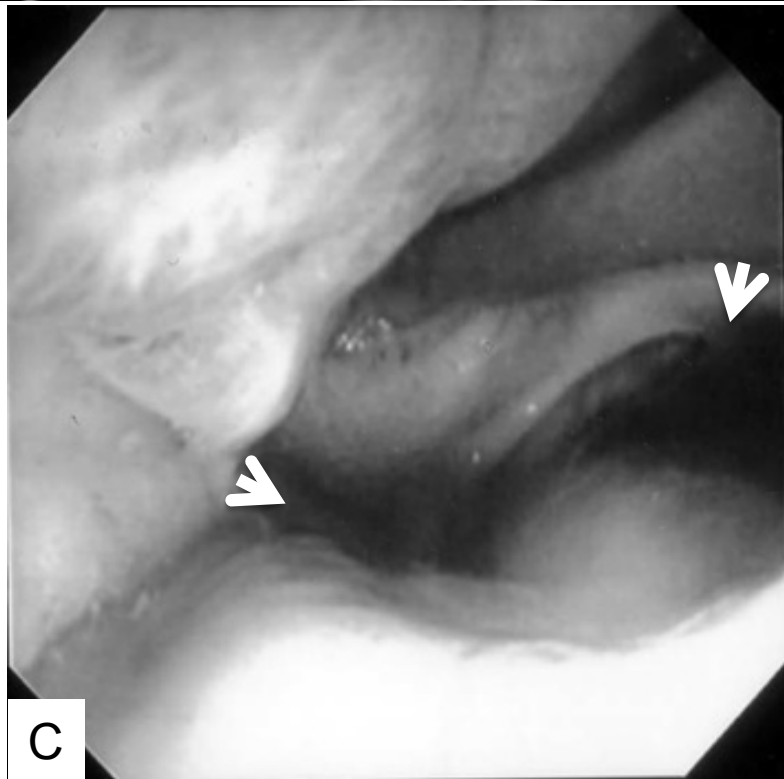

Supplement: MOESM2 [file 9635626]
